# Supplementary material
Source: PubMed Central journal article supplement (PMC1820961)
Supplement: plntcell_tpc.106.048165_3.pdf [file plntcell_tpc.106.048165_3.pdf]

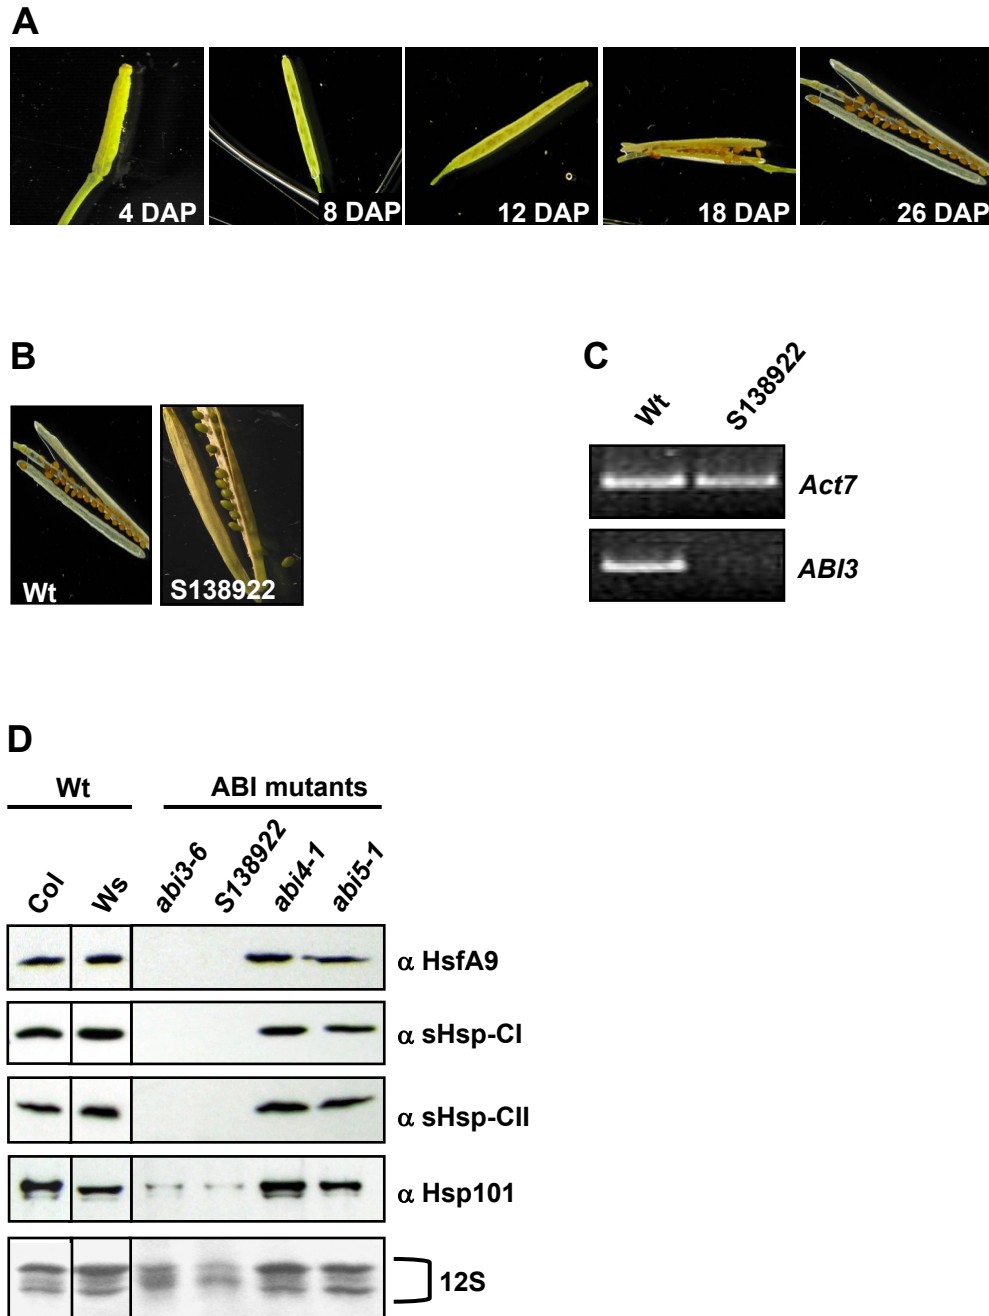

**Figure S3.** Analysis of *ABI* mutant lines.

(A) Photographs showing developing siliques of wild-type plants from 4 to 26 days after pollination (DAP).

(B) Photographs showing siliques 26 DAP from wild-type (Wt) plants and the Salk *ABI3* mutant line (S138922).

(C) Analysis of *ABI3* transcript levels by RT-PCR from mRNA extracted from siliques 26 DAP from Wt plants and the Salk *ABI3* mutant (S13892) as indicated. As a control the transcript levels of *Actin7* (*Act7*) were analyzed.

(D) Analysis of HsfA9 and Hsp proteins by immuno blot analysis with specific antisera against HsfA9 and selected Hsps. As control the 12S storage proteins (12S) on the Ponceau-stained membrane are shown. Protein extracts were prepared from green seeds from the *ABI3* mutant lines *abi3-6* and S138922 as well as mutant lines of the transcription factors *ABI4* and *ABI5* (*abi4-1* and *abi5-1*, for description, see Table S1). Because the mutants are in different ecotype backgrounds, the corresponding Wt plants were also analyzed (*Col*, Columbia; *Ws*, Wassilewskija). For further details, see Figure 2B and Methods.
