# Supplementary material
Source: PubMed Central journal article supplement (PMC1820961)
Supplement: plntcell_tpc.106.048165_4.pdf [file plntcell_tpc.106.048165_4.pdf]

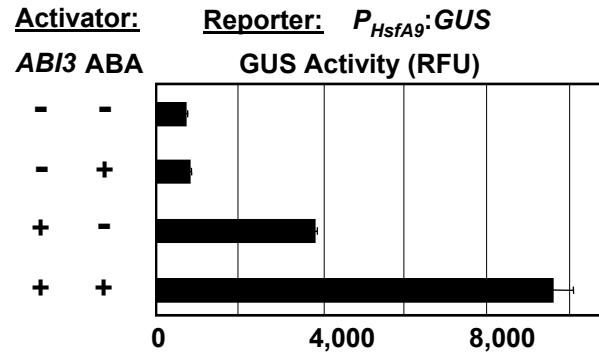

**Figure S4.** Influence of ABA on the induction of *HsfA9* in transient reporter assays.

The activator potential of ABI3 on the *HsfA9* promoter was tested in Arabidopsis suspension culture protoplasts by transient co-transformation with a reporter construct containing a 1kb promoter fragment of the *HsfA9* gene fused to *GUS* ( $P_{HsfA9}:GUS$ ) in the absence or presence of 5 $\mu$ M abscisic acid (-/+ ABA). The resulting GUS activities (rel. fluorescence units, RFU) are presented with error bars for the standard deviation of three independent replicates. For further details, see Figure 3 and Methods.
