# Supplementary material
Source: PubMed Central journal article supplement (PMC1820961)
Supplement: plntcell_tpc.106.048165_5.pdf [file plntcell_tpc.106.048165_5.pdf]

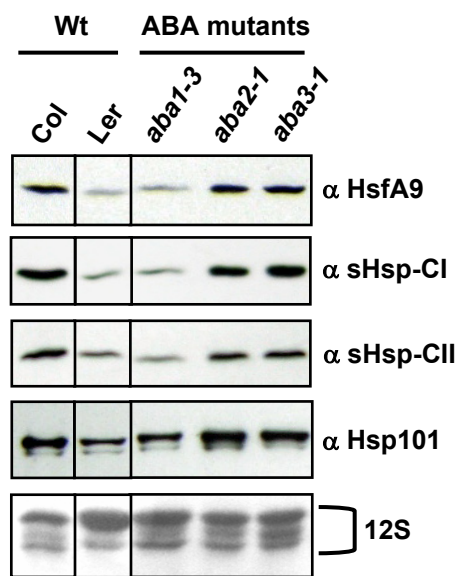

**Figure S5.** Analysis of ABA deficient mutant lines.

Analysis of HsfA9 and Hsp proteins by immuno blot analysis with specific antisera against HsfA9 and selected Hsps. As control the 12S storage proteins (12S) on the Ponceau-stained membrane are shown. Protein extracts were prepared from dry seeds from the ABA deficient mutant lines *aba1-3*, *aba2-1* and *aba3-1* (for description, see Table S1). Because the mutants are in different ecotype backgrounds, the corresponding Wt plants were also analyzed (*Col*, Columbia; *Ler*, Landsberg erecta). For further details, see Figure 2B and Methods.
