# Supplementary material
Source: PubMed Central journal article supplement (PMC1820961)
Supplement: plntcell_tpc.106.048165_7.pdf [file plntcell_tpc.106.048165_7.pdf]

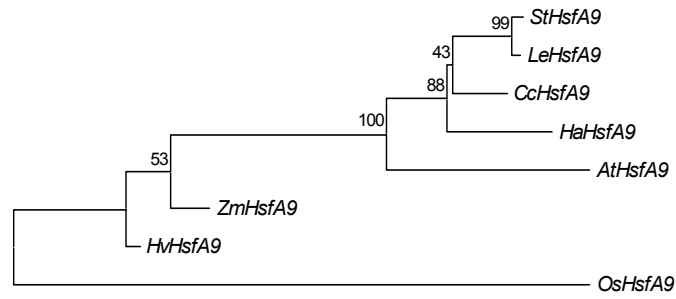

**Figure S7.** Neighbor-joining analysis of HsfA9 homologues.

At, *Arabidopsis thaliana*, Cc, *Coffea canephora*, Ha, *Helianthus annuus*, Hv, *Hordeum vulgare*, Le, *Lycopersicon esculentum*, Os, *Oryza sativa*, St, *Solanum tuberosum*, Zm, *Zea mays*. For further details see Methods.
